# Supplementary material for: Motives, frequency, predictors and outcomes of MRA discontinuation in a real-world heart failure population
Source: HighWire-hosted journal article supplement (doi:10.1136/openhrt-2022-002022), 2022-09-01
Supplement: openhrt-2022-002022supp001_data_supplement.pdf [file openhrt-2022-002022supp001_data_supplement.pdf]

## Supplementary material

**Table 1. Weighted score for Charlson comorbidity index.**

| <b>Charlson comorbidity index</b>                                                                                            | <b>Points</b>                                                                                       |
|------------------------------------------------------------------------------------------------------------------------------|-----------------------------------------------------------------------------------------------------|
| <b>Myocardial infarction</b>                                                                                                 | 1                                                                                                   |
| <b>Congestive heart failure</b>                                                                                              | 1                                                                                                   |
| <b>Peripheral vascular disease</b>                                                                                           | 1                                                                                                   |
| <b>Cerebrovascular disease</b>                                                                                               | 1                                                                                                   |
| <b>Dementia</b>                                                                                                              | 1                                                                                                   |
| <b>Chronic obstructive pulmonary disease</b>                                                                                 | 1                                                                                                   |
| <b>Connective tissue disease</b>                                                                                             | 1                                                                                                   |
| <b>Peptic ulcer disease</b>                                                                                                  | 1                                                                                                   |
| <b>Diabetes mellitus – uncomplicated</b>                                                                                     | 1                                                                                                   |
| <b>Diabetes mellitus – end organ damage</b>                                                                                  | 2                                                                                                   |
| <b>Moderate to severe chronic kidney disease</b>                                                                             | 2                                                                                                   |
| <b>Hemiplegia</b>                                                                                                            | 2                                                                                                   |
| <b>Leukaemia</b>                                                                                                             | 2                                                                                                   |
| <b>Malignant lymphoma</b>                                                                                                    | 2                                                                                                   |
| <b>Solid tumour/cancer</b>                                                                                                   | 2                                                                                                   |
| <b>Metastatic disease</b>                                                                                                    | 6                                                                                                   |
| <b>Liver disease – mild</b>                                                                                                  | 1                                                                                                   |
| <b>Liver disease – moderate to severe</b>                                                                                    | 3                                                                                                   |
| <b>AIDS</b>                                                                                                                  | 6                                                                                                   |
| Diabetes end organ damage – Diabetes and moderate to severe kidney disease, cardiovascular disease or myocardial infarction. | Severe liver disease - cirrhosis and portal hypertension with history of variceal bleeding history. |
| Mild liver disease - chronic hepatitis and/or cirrhosis without portal hypertension.                                         | Lymphoma – Different kinds of lymphoma, myeloma                                                     |
| Moderate liver disease - cirrhosis and portal hypertension without history of variceal bleeding.                             | Leukemia – Different kinds of leukemia, Polycythemia Vera (PCV)                                     |
